# Supplementary material for: A Rab10:RalA G protein cascade regulates insulin-stimulated glucose uptake in adipocytes
Source: PubMed Central journal article supplement — Mol Biol Cell. 2014 Oct 1;25(19):3059–69. doi: 10.1091/mbc.E14-06-1060 (PMC4230594; doi:10.1091/mbc.e14-06-1060), 2014-10-01

# Supplemental Materials

*Molecular Biology of the Cell*

Karunanithi et al.

**Supplemental Figure Legends:**

Figure S1: Development of GST-Rim1 RBD pull-down assay. (A) Schematic of effector pull-down assay. Immobilized Rab10 effector selectively isolates the GTP-bound active Rab10 from whole cell lysate. (B) COS-1 cells were transiently transfected with Myc-Rim1-RBD and/or HA-Rab10 WT, QL, TN as indicated. Whole cell lysates (lower panels) or anti-HA immunoprecipitates were subjected to immunoblotting with anti-Myc or anti-HA antibodies. (C) COS-1 cells were transiently transfected with HA-Rab10 construct and cell lysates bound to GDP or GTP $\gamma$ S were incubated with immobilized GST or GST-Rim1-RBD as indicated. Associated proteins were resolved on SDS-PAGE and determined by Western Blot with anti-HA antibody. (D) Cos-1 cell lysates overexpressing Flag-AS160 WT and/or Myr-Akt in the presence of HA-Rab10. GST-Rim-RBD beads were used to pull down active Rab10. Levels of proteins in the total cell lysates and pull down are shown. (E) Quantification of blots in 'D' from at least three independent experiments (n=3, \*p<0.05).

Figure S2: RalA does not affect Rab10 activity. GST-Rim1-RBD pull down assay was performed on Cos-1 lysates expressing HA-Rab10 together with wild type, active (GV) or inactive (SN) RalA. Rab10 levels in total cell lysates and active Rab10 are determined by western blotting.

Figure S3: Rlf interacts with active Rab10. Myc-Rab10 (WT or QL) was expressed alone or together with HA-Rlf. Immunoprecipitation experiment with anti-Myc antibody was performed and co-precipitated HA-Rlf was analyzed in an immunoblot.

Figure S4: Rab10 has a localized effect on RalA. (A) Cos-1 cells overexpressing vector, pRK5-Myc-Rlf or Rlf-CAAX were subjected to sub-cellular fractionation. Crude membrane (M) and

cytosolic (C) fractions were subjected to SDS-PAGE and immunoblotted. Expression in whole cell lysates is shown (lower panels). (B) Flag-RalA was co-expressed with vector, wild type Rlf or Rlf-CAAX. Cell lysates were pulled down using Sec5-RBD beads to assess RalA activity using immunoblots. (C) Cos-1 cells transfected with RFP vector, RFP-AS160GAP or RFP-AS160GAP-Rab10tail together with Flag-RalA. Pull down experiment was performed with GST-RalBP1 beads and subjected to immunoblotting.

**Supplemental Methods:****Oligo Sequences:**

AS160\_mouse: CGACCUCACCUACUUUGCCUAUUUG

Rab10\_mouse\_1: GACGAUGCCUUCAAUACCACCUUUA

Rab10\_mouse\_2: AACAGAUUGCAAGGGAGCAUGGUAU

Rlf\_mouse\_1: GAACCUUCCUGAAGGACCUCGUGAU

Rlf\_mouse\_2: CCACACUCAGCUAACGUCUUCUAUG

RalA\_mouse\_1: GGAAGAAGUGCAGAU CGACAUCUUA

RalA\_mouse\_2: UAACUAUGUGGAGACGUCUGCUAAA

Rlf\_human\_1: GCUCCGAAACUUCUCUUCAGUUUAU

Rlf\_human\_2: GCCAUGGAUGGAGCUUCACACGAUU



**Figure S1**

**A**

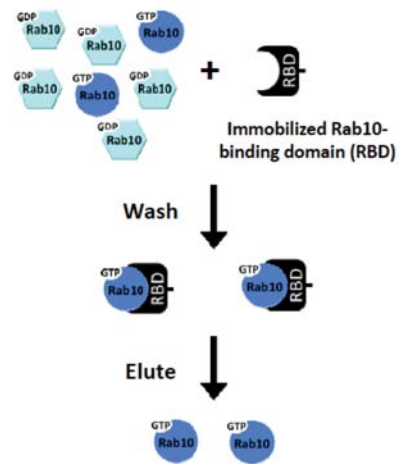

**B**

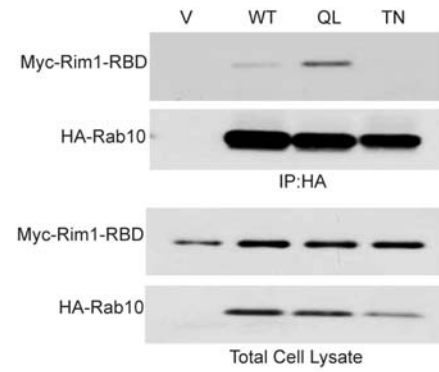

**C**

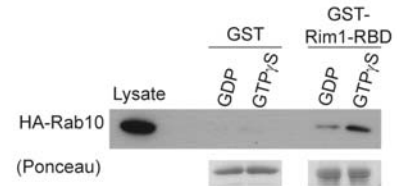

**D**

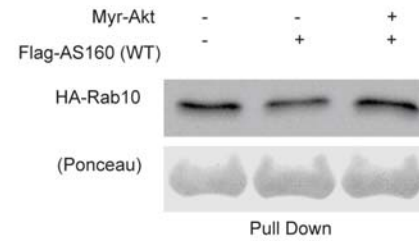

**E**

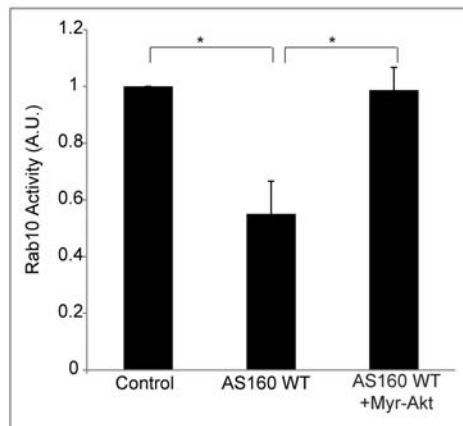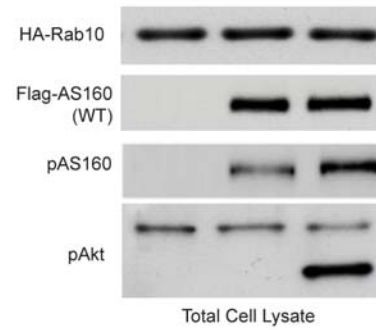

**Figure S2**

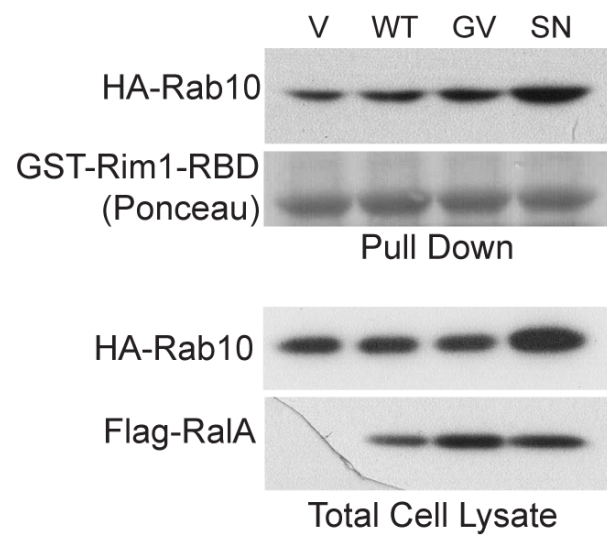

**Figure S3**

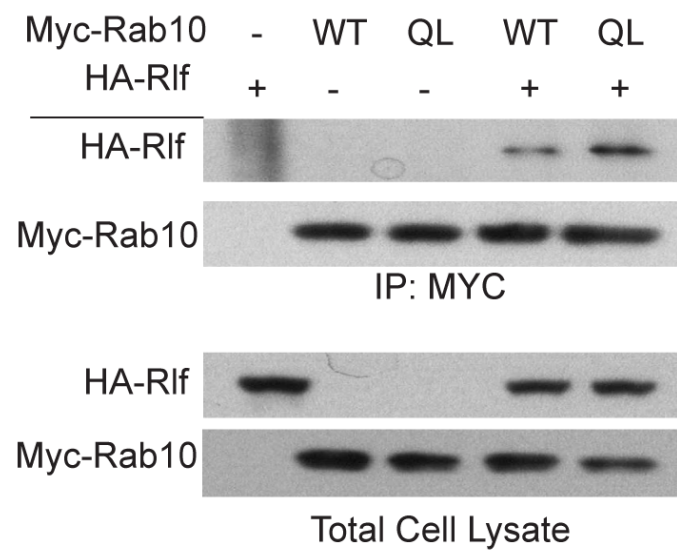

**Figure S4**

**A**

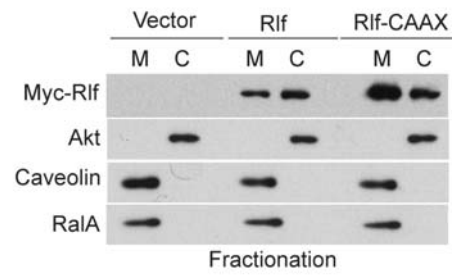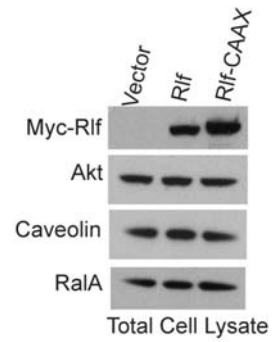

**B**

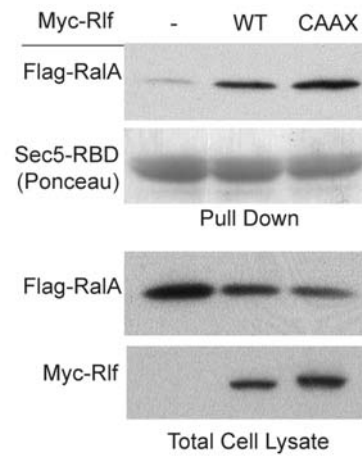

**C**

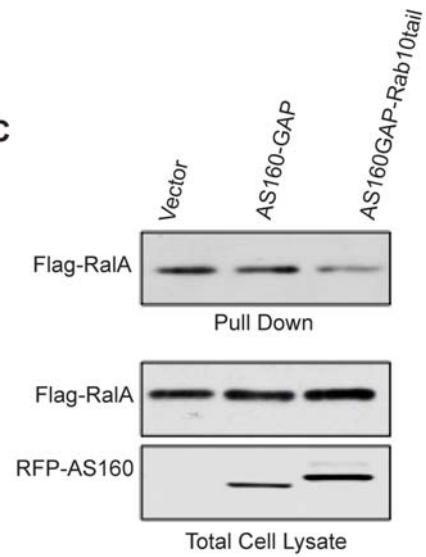

Supplement: supp_E14-06-1060_CombinedSupMats.pdf [file supp_E14-06-1060_CombinedSupMats.pdf]
